# Supplementary material for: Early N-Terminal Pro B-Type Natriuretic Peptide (NTproBNP) Plasma Values and Associations with Patent Ductus Arteriosus Closure and Treatment—An Echocardiography Study of Extremely Preterm Infants
Source: MDPI journal article supplement (doi:10.3390/jcm11030667), 2022-01-27
Supplement: s1 [file s1]

| Supplemental Table S1. Clinical local guidelines for diagnosing and treating a haemodynamic significant patent ductus arteriosus (hsPDA) at the Karolinska University Hospital during 2012-2014* |                                                                     |                                                                                                                                                             |
|--------------------------------------------------------------------------------------------------------------------------------------------------------------------------------------------------|---------------------------------------------------------------------|-------------------------------------------------------------------------------------------------------------------------------------------------------------|
|                                                                                                                                                                                                  | Echocardiographic criteria of a hsPDA                               | Echocardiographic projection details                                                                                                                        |
| <b>Ductal characteristics</b>                                                                                                                                                                    |                                                                     |                                                                                                                                                             |
| Diameter                                                                                                                                                                                         | Diameter of the duct >1.5mm                                         | Ductal diameter was acquired with two-dimensional mode at the narrowest diameter of the ductal pulmonary end, in a high parasternal short axis (ductal cut) |
| Direction of flow through the duct                                                                                                                                                               | Left to right shunt (L->R)                                          | Colour Doppler was used to detect the PDA and the direction of the flow (left to right, bidirectional or right to left)                                     |
| Flow characteristics                                                                                                                                                                             | Pulsatile flow through the duct with a non-restrictive flow profile | Duct visualized from ductal cut. Velocity through duct was measured either with pulsed wave Doppler or continuous wave Doppler                              |
| <b>Excessive pulmonary flow</b>                                                                                                                                                                  |                                                                     |                                                                                                                                                             |
| Left atrium                                                                                                                                                                                      | LA:Ao ratio >1.5                                                    | Left atrial diameter and aortic root dimension was determined in two-dimensional mode according to guidelines and standards in a parasternal long axis view |
| Pulmonary flow characteristics                                                                                                                                                                   | End-diastolic flow in left or right pulmonary artery >0.2m/s        | Diastolic forward flow velocity measured with pulsed wave Doppler in left or right pulmonary artery from a high parasternal short axis view                 |
| <b>End-organ ductal steal</b>                                                                                                                                                                    |                                                                     |                                                                                                                                                             |

|                                                                                                                                                                                                                                                                                                                                                                                                                                                                             |                                                                                                                                                  |                                                                                                                                                                                                                                                                                                                                                                                                                                |
|-----------------------------------------------------------------------------------------------------------------------------------------------------------------------------------------------------------------------------------------------------------------------------------------------------------------------------------------------------------------------------------------------------------------------------------------------------------------------------|--------------------------------------------------------------------------------------------------------------------------------------------------|--------------------------------------------------------------------------------------------------------------------------------------------------------------------------------------------------------------------------------------------------------------------------------------------------------------------------------------------------------------------------------------------------------------------------------|
|                                                                                                                                                                                                                                                                                                                                                                                                                                                                             | Signs of ductal steal (reversed diastolic flow in descending aorta /reversed or absent flow in mesenteric artery and/or anterior cerebral artery | Pulsed wave Doppler was used to detect reversed diastolic flow in descending thoracic aorta and images were acquired from a high parasternal view. The subcostal view was used for abdominal aorta or mesenteric reversed or absent diastolic flow. Pulsed wave Doppler was used to assess reversed diastolic flow in abdominal aorta, reversed or absent diastolic flow in mesenteric artery and/or anterior cerebral artery. |
| <b>Heart failure and ventricular enlargement</b>                                                                                                                                                                                                                                                                                                                                                                                                                            |                                                                                                                                                  |                                                                                                                                                                                                                                                                                                                                                                                                                                |
|                                                                                                                                                                                                                                                                                                                                                                                                                                                                             | Visual signs of left ventricular enlargement. Assessment of left ventricle end-diastolic diameter (compared with reference values).              | Left ventricle diameter was determined in two-dimensional mode according to guidelines and standards in a parasternal long axis view                                                                                                                                                                                                                                                                                           |
| <p>Abbreviations: hsPDA: haemodynamic significant patent ductus arteriosus; LA:Ao: left atrium: aortic root ratio</p> <p>*The treatment decision was at the discretion of the attending neonatologist. Clinical signs such as respiratory status with invasive ventilation and fraction of inspired oxygen, feeding intolerance, clinical signs of heart failure and haemodynamic compromise, were combined with the echocardiography findings described in this table.</p> |                                                                                                                                                  |                                                                                                                                                                                                                                                                                                                                                                                                                                |

| <b>Supplemental Table S2.</b> Characteristics of the infants not treated for PDA |                         |                           |                                                          |                                                          |
|----------------------------------------------------------------------------------|-------------------------|---------------------------|----------------------------------------------------------|----------------------------------------------------------|
|                                                                                  | <i>No PDA treatment</i> |                           |                                                          |                                                          |
|                                                                                  | All                     | No closure <sup>a,b</sup> | Spontaneous closure <sup>a</sup><br>at ≤7<br>days of age | Spontaneous closure <sup>a</sup><br>at >7<br>days of age |
| N=98                                                                             | N=40                    | N=7                       | N=6                                                      | N=27                                                     |
| Any antenatal steroids, n (%)                                                    | 39 (98)                 | 7 (100)                   | 6 (100)                                                  | 26 (93)                                                  |
| Multiple birth, n (%)                                                            | 10 (25)                 | 2 (28)                    | 1 (17)                                                   | 7 (26)                                                   |
| Vaginal delivery, n (%)                                                          | 10 (25)                 | 3 (43)                    | 1 (17)                                                   | 6 (22)                                                   |
| Chorioamnionitis, n (%)                                                          | 17 (43)                 | 4 (57)                    | 3 (50)                                                   | 10 (37)                                                  |

|                                                                             |            |            |            |             |
|-----------------------------------------------------------------------------|------------|------------|------------|-------------|
| Gestational age, weeks, mean (SD)                                           | 26.4 (1.1) | 24.7 (1.1) | 26.4 (0.9) | 26.8 (0.9)  |
| Birth weight, grams, mean (SD)                                              | 816 (173)  | 788 (174)  | 752 (88)   | 851 (176)   |
| SDS birth weight, mean (SD)                                                 | -1.4 (1.4) | -1.0 (1.1) | -2.2 (0.9) | -0.85 (1.0) |
| Female sex, n (%)                                                           | 21 (53)    | 2 (33)     | 2 (33)     | 17 (61)     |
| Apgar <7 at 5 min, n (%)                                                    | 15 (38)    | 6 (86)     | 1 (17)     | 8 (30)      |
| Surfactant within two hours after birth, n (%)                              | 16 (38)    | 6 (86)     | 1 (17)     | 9 (33)      |
| Median age at PDA closure <sup>a</sup> , days (IQR)                         | 21 (12-45) | NA         | 3 (2-3)    | 28 (18-65)  |
| Death before ductal closure, n (%)                                          | 6 (15)     | 6 (86)     | 0 (0)      | 0 (0)       |
| <sup>a</sup> date of ultrasound confirmed ductal closure or date of surgery |            |            |            |             |

<sup>b</sup> infant transferred before closure so date only known in 33/40 infants as six died before closure

Abbreviations: PDA: patent ductus arteriosus; SD: standard deviation; IQR: interquartile range; NA: not applicable

**Supplemental Table S3.** Censoring protocol for the Kaplan Meier survival curves of ductal closure in the cohort

| Outcome                                   | Number of infants | Censoring                                           | Comment                                                                  |
|-------------------------------------------|-------------------|-----------------------------------------------------|--------------------------------------------------------------------------|
| Spontaneous closure without PDA treatment | 32                | On date of confirmed ductal closure with ultrasound | One infant died after spontaneous closure, but had already been censored |
| Closure after ibuprofen PDA treatment     | 25                | On date of confirmed ductal closure with ultrasound |                                                                          |
| Closure after PDA surgery                 | 5                 | On date of PDA surgery                              |                                                                          |

|                                                                                                                   |    |                           |  |
|-------------------------------------------------------------------------------------------------------------------|----|---------------------------|--|
| Closure after<br>ibuprofen and later<br>PDA surgery                                                               | 17 | On date of PDA<br>surgery |  |
| Death without PDA<br>treatment                                                                                    | 6  | On date of death          |  |
| Death after PDA<br>treatment                                                                                      | 5  | On date of death          |  |
| Transfer to another<br>Swedish hospital out<br>of Stockholm region<br>before closure,<br>without PDA<br>treatment | 1  | On date of transfer       |  |
| Transfer to another<br>Swedish hospital out<br>of Stockholm region                                                | 4  | On date of transfer       |  |

|                                                                     |   |                                                                                  |  |
|---------------------------------------------------------------------|---|----------------------------------------------------------------------------------|--|
| before closure, after<br>PDA treatment                              |   |                                                                                  |  |
| Closure after PDA<br>treatment at 40<br>weeks<br>postmenstrual age* | 2 | At assigned ductal<br>closure at 40 weeks<br>as no later<br>ultrasound available |  |
| Spontaneous<br>closure at 40 weeks<br>postmenstrual age*            | 1 | At assigned ductal<br>closure at 40 weeks<br>as no later<br>ultrasound available |  |
| *Three infants were assigned a closure date at full-term age        |   |                                                                                  |  |

| <b>Supplemental Table S4.</b> Comparison of the PDA closure age as estimated by medians and by 50% closure with Kaplan-Meier survival analysis estimates |                                                  |                                                                  |
|----------------------------------------------------------------------------------------------------------------------------------------------------------|--------------------------------------------------|------------------------------------------------------------------|
|                                                                                                                                                          | Median closure age in days<br>(IQR) <sup>†</sup> | Age in days at 50% closure<br>rate (25%; 75% rate) <sup>††</sup> |
| All infants in the cohort                                                                                                                                | N=82<br><br>23 (15-57)                           | N=98<br><br>45 (20;83)                                           |
| <i>By gestational age</i>                                                                                                                                |                                                  |                                                                  |
| - At less than 25 weeks                                                                                                                                  | N=14<br><br>18.5 (15-32)                         | N=24<br><br>51 (38;57)                                           |
| - At 25 weeks or higher                                                                                                                                  | N=68<br><br>24 (14-63)                           | N=74<br><br>42 (17;83)                                           |
| <i>By ibuprofen doses*</i>                                                                                                                               |                                                  |                                                                  |
| No ibuprofen treatment                                                                                                                                   | N=33                                             | N=40                                                             |

|                                                                                                                                                                                                                                                                                                                                                                                                                                                                   |                      |                                      |
|-------------------------------------------------------------------------------------------------------------------------------------------------------------------------------------------------------------------------------------------------------------------------------------------------------------------------------------------------------------------------------------------------------------------------------------------------------------------|----------------------|--------------------------------------|
|                                                                                                                                                                                                                                                                                                                                                                                                                                                                   | 21 (11-46)           | 24 (13;58)                           |
| Ibuprofen doses 3 or less                                                                                                                                                                                                                                                                                                                                                                                                                                         | N=16<br>21 (13.5-47) | N=17<br>55 (15;missing) <sup>‡</sup> |
| More than 3 doses ibuprofen                                                                                                                                                                                                                                                                                                                                                                                                                                       | N=28<br>35 (18.5-63) | N=36<br>63 (45;115)                  |
| <i>No treatment or any ibuprofen treatment**</i>                                                                                                                                                                                                                                                                                                                                                                                                                  |                      |                                      |
| No treatment                                                                                                                                                                                                                                                                                                                                                                                                                                                      | N=33<br>21 (11-46)   | N=33<br>21 (11;46)                   |
| Ibuprofen only                                                                                                                                                                                                                                                                                                                                                                                                                                                    | N=27<br>51 (17-106)  | N=27<br>51 (17;106)                  |
| <sup>‡</sup> Infants who were transferred or died before ductal closure excluded<br><br><sup>††</sup> all infants included or as specified in each analysis with an observation time until 133 days of age. From the Kaplan-Meier survival curve, the 50% closure rates with 25% and 75% rates are shown. The analysis does not show the 75% rates in some subgroups due to a limited number of infants<br><br>*Infants (N=5) having primary PDA surgery excluded |                      |                                      |

\*\*Infants later dying, undergoing PDA surgery or being transferred before ductal closure excluded

Supplemental Figure S1a

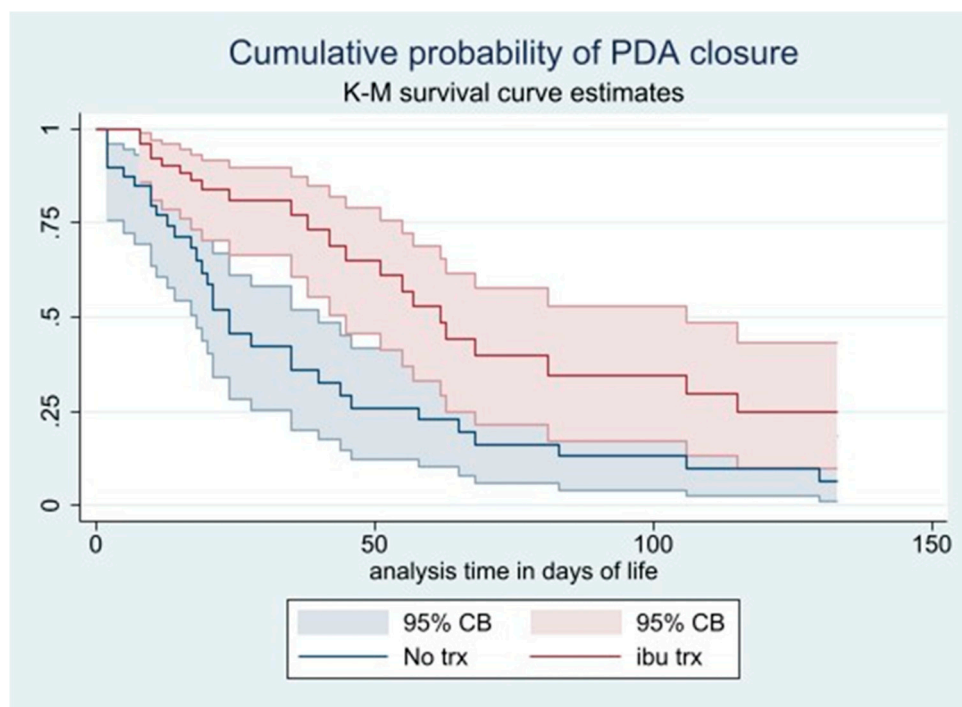

**Supplemental Figure S1a.** The cumulative probability of PDA closure for all infants, except those who underwent primary PDA surgery (N=93), is shown in a K-M survival curve with 95% CB. The analysis time was until 133 days of age as then all the infants had reached 40 weeks postmenstrual age. The censoring protocol is shown in Supplemental table 3. Infants are divided into those receiving ibuprofen treatment and those not receiving any treatment. Abbreviations: PDA: patent ductus arteriosus; K-M: Kaplan-Meier; CB: confidence bands

Supplemental Figure S1b

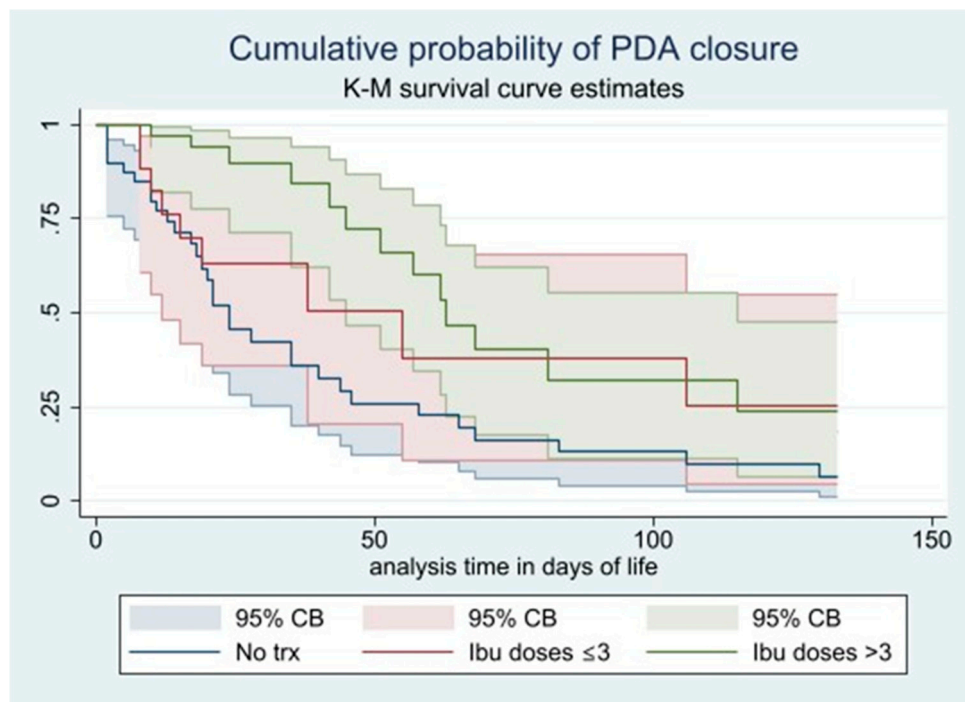

**Supplemental Figure S1b.** The cumulative probability of PDA closure for all infants except those who underwent primary PDA surgery (N=93) is shown in a K-M survival curve with 95% CB. The analysis time was until 133 days of age as then all the infants had reached 40 weeks postmenstrual age. The censoring protocol is shown in Supplemental table 3. Infants are divided into following categories: no treatment, three doses of ibuprofen or less and more than three doses of ibuprofen. Abbreviations: PDA: patent ductus arteriosus; K-M: Kaplan-Meier; trx:treatment; Ibu: ibuprofen; CB: confidence bands

Supplemental Figure S2

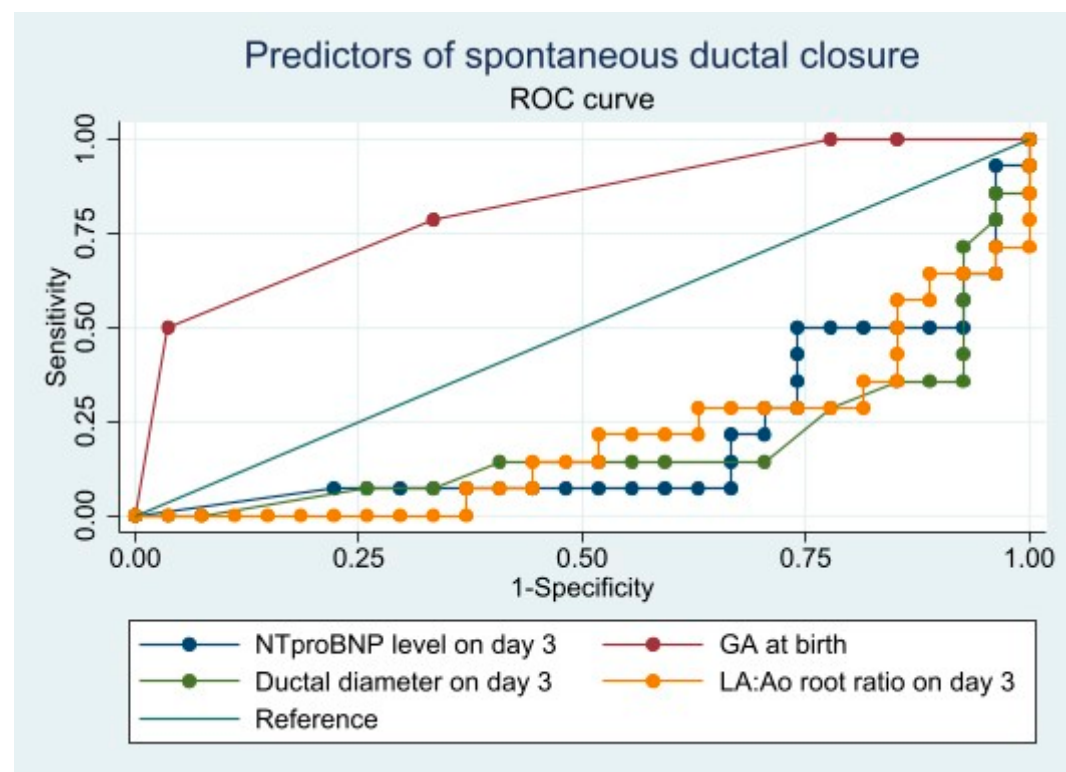

**Supplemental Figure S2.** The ROC curve is shown for all predictors of spontaneous ductal closure. It was studied how NTproBNP level on day three, GA at birth, diameter of the duct and LA:Ao ratio on day three predicted spontaneous closure. NTproBNP level on day three resulted in an AUC value of 0.31 (95% CI 0.19-0.43), with a sensitivity and specificity of 61% and 20% respectively, for the cut-off value at 6001-9000 ng/L. For GA the AUC was 0.76 (0.67-0.86) with a sensitivity and specificity of 74% and 63% respectively, at a cut-off GA at 26 weeks, in predicting spontaneous ductal closure. The AUC for ductal diameter was 0.18 (0.04-0.33) and LA:Ao ratio the AUC was 0.20 (0.06-0.34).

Abbreviations: ROC: receiver operating characteristics; NTproBNP: N-terminal pro B-type natriuretic peptide; LA:Ao ratio: Left atrium to aortic root ratio; AUC: area under the curve.

Supplemental Figure S3

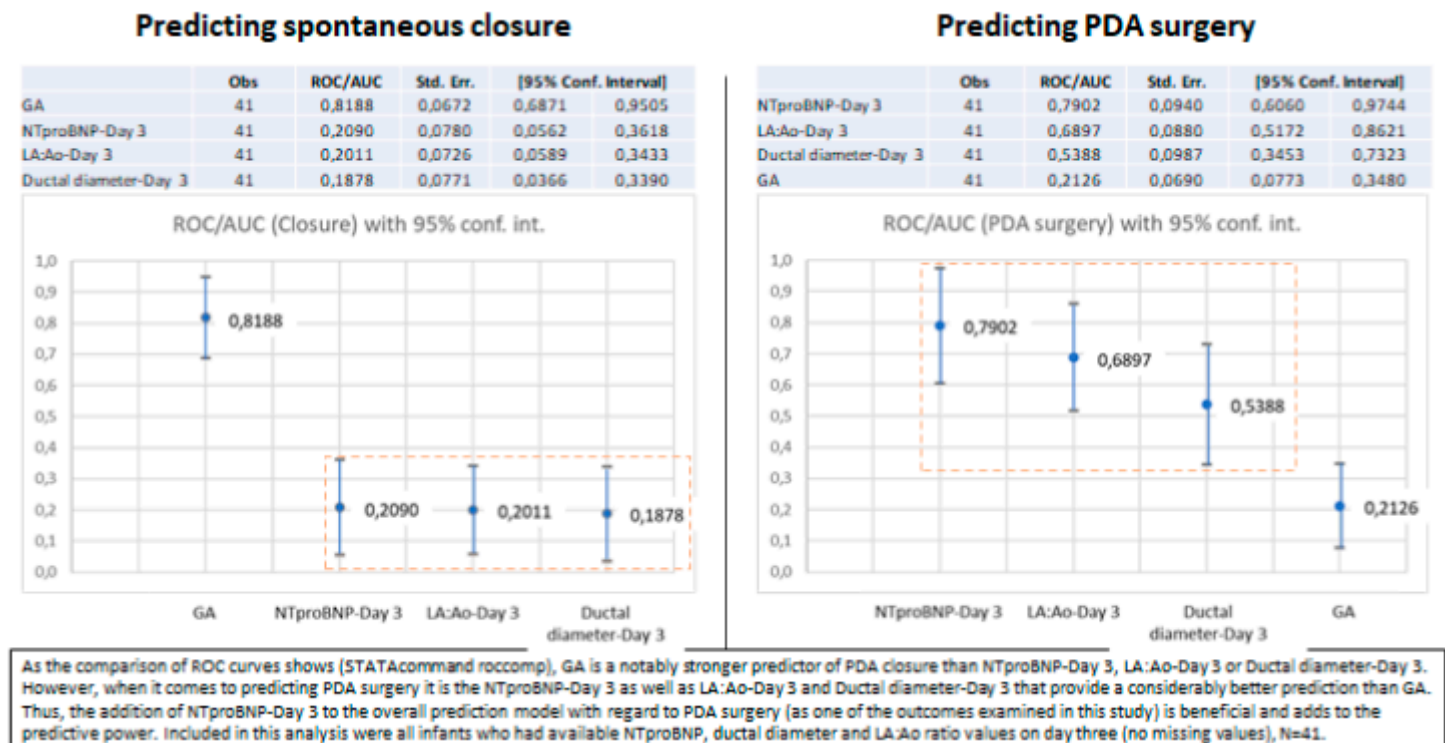

Comparison of the confidence intervals for the AUC values of the different predictors of spontaneous PDA closure and PDA surgery respectively.

Supplemental Figure S4

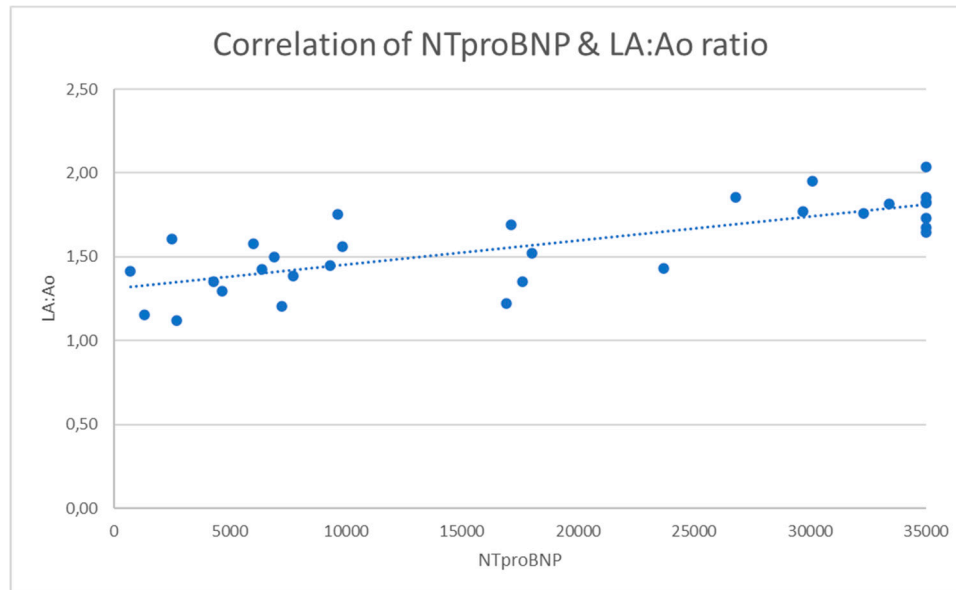

**Supplemental Figure S4.** The scatterplot shows the relationship between NTproBNP and LA:Ao ratio (N=31). The linear model was used to fit the regression line ( $R^2$  equals to 0.58). The Pearson correlation coefficient is 0.76. As we see, there is a reasonable correlation between these two variables. The presence of correlation in this case does not imply a causation and infers rather to an association between the studied variables.

Abbreviations: NTproBNP: N-terminal pro B-type natriuretic peptide; LA:Ao: Left atrium to aortic root ratio.
